# Supplementary material for: Aromatic metamorphosis: conversion of an aromatic skeleton into a different ring system
Source: Royal Society of Chemistry journal article supplement (doi:10.1039/c7cc00078b), 2017-01-01
Supplement: c7cc00078b1.pdf [file c7cc00078b1.pdf]

**There is no supplementary information available for this article**
